# Supplementary material for: Genetic association of FTO/IRX region with obesity and overweight in the Polish population
Source: PLoS One. 2017 Jun 29;12(6):e0180295. doi: 10.1371/journal.pone.0180295 (PMC5491248; doi:10.1371/journal.pone.0180295)
Supplement: S3 Table — Bold font denotes haplotypes with statistically significant p values. (XLSX) [file pone.0180295.s007.xlsx]

## Sheet: Arkusz1
Block	Haplotype Freq.	Case, Control Ratio Counts	Case,Control Frequencies	Chi Square	P Value
Block 1
GT	0.555	859.0 : 735.0, 2942.5 : 2305.5	0.539, 0.561	2.348	0.1254
AC	0.314	528.8 : 1065.2, 1611.6 : 3636.4	0.332, 0.307	3.45	0.0633
AT	0.128	199.5 : 1394.5, 677.7 : 4570.3	0.125, 0.129	0.171	0.679
Block 2
TG	0.535	862.9 : 731.1, 2818.0 : 2422.0	0.541, 0.538	0.062	0.8031
CA	0.278	435.0 : 1159.0, 1443.0 : 3797.0	0.273, 0.275	0.038	0.8458
CG	0.187	296.1 : 1297.9, 979.0 : 4261.0	0.186, 0.187	0.009	0.9233
Block 3
GGAGGGCGTCCC	0.633	1013.8 : 563.6, 3317.8 : 1875.3	0.643, 0.639	0.077	0.7819
TTAAAGTGTCTT	0.179	269.6 : 1307.8, 933.2 : 4260.0	0.171, 0.180	0.64	0.4237
TGGGAATGTTCT	0.055	82.0 : 1495.4, 289.0 : 4904.2	0.052, 0.056	0.314	0.5753
TTAAAGCGCCCT	0.026	34.2 : 1543.2, 153.1 : 5040.0	0.022, 0.029	2.763	0.0965
TTAAAGCGTCCC	0.018	36.5 : 1540.9, 87.4 : 5105.8	0.023, 0.017	2.657	0.1031
TGAGGGCGTCCC	0.017	35.1 : 1542.2, 81.2 : 5112.0	0.022, 0.016	3.165	0.0752
TGAAAGTGTCCT	0.017	28.4 : 1549.0, 81.7 : 5111.5	0.018, 0.016	0.397	0.5286
TTAAAGTATCCT	0.016	19.6 : 1557.8, 82.5 : 5110.7	0.012, 0.016	0.983	0.3216
Block 4
GC	0.897	1442.0 : 152.0, 4703.0 : 545.0	0.905, 0.896	0.964	0.3263
GT	0.079	118.0 : 1476.0, 415.0 : 4833.0	0.074, 0.079	0.434	0.51
CC	0.024	34.0 : 1560.0, 130.0 : 5118.0	0.021, 0.025	0.619	0.4314
Block 5
CTT	0.889	1426.0 : 168.0, 4678.0 : 568.0	0.895, 0.892	0.105	0.7454
CTC	0.059	93.0 : 1501.0, 314.7 : 4931.3	0.058, 0.060	0.059	0.808
TCC	0.027	43.0 : 1551.0, 132.0 : 5114.0	0.027, 0.025	0.161	0.6879
CCC	0.025	32.0 : 1562.0, 121.3 : 5124.7	0.020, 0.023	0.518	0.4718
Block 6
GAAAG	0.508	822.8 : 771.2, 2625.2 : 2616.8	0.516, 0.501	1.153	0.283
AAGGG	0.335	523.5 : 1070.5, 1803.5 : 3438.5	0.328, 0.344	1.332	0.2484
AAAAG	0.079	134.2 : 1459.8, 397.8 : 4844.2	0.084, 0.076	1.183	0.2768
AAGGA	0.057	84.3 : 1509.7, 316.7 : 4925.3	0.053, 0.060	1.26	0.2617
AGAAG	0.018	26.0 : 1568.0, 88.0 : 5154.0	0.016, 0.017	0.017	0.8965
Block 7
AAA	0.460	732.0 : 862.0, 2431.0 : 2815.0	0.459, 0.463	0.086	0.7695
GGA	0.359	575.9 : 1018.1, 1875.5 : 3370.5	0.361, 0.358	0.075	0.7838
GAG	0.146	221.9 : 1372.1, 780.5 : 4465.5	0.139, 0.149	0.9	0.3429
GAA	0.031	56.1 : 1537.9, 145.5 : 5100.5	0.035, 0.028	2.392	0.1219
Block 8
GAACAACTCGGAACAGATGGTTCA	0.426	725.0 : 841.0, 2139.9 : 3021.0	0.463, 0.415	11.474	7.0E-4
TGGTATTCTTTCGTGGTCAACGTG	0.321	469.6 : 1096.4, 1704.1 : 3456.8	0.300, 0.330	5.042	0.0247
TGGTATTCTTTCGTGGTCGACGTG	0.088	120.4 : 1445.5, 465.0 : 4695.9	0.077, 0.090	2.629	0.1049
TGGTGTCCTTGCGTGGTCGACGCG	0.043	61.0 : 1505.0, 232.0 : 4928.9	0.039, 0.045	1.038	0.3083
TGGTATCCTTGCGTGGTCGACGCG	0.035	56.0 : 1510.0, 189.0 : 4971.9	0.036, 0.037	0.025	0.8734
GAACAACTCGGAACAGATGGTTCG	0.022	30.0 : 1536.0, 112.0 : 5048.9	0.019, 0.022	0.379	0.5381
GAACAACTTTTCGTGGTCGACGTG	0.019	40.9 : 1525.1, 87.9 : 5073.0	0.026, 0.017	5.293	0.0214
GAATATCTTTGCGTGGTTGGTTCG	0.015	17.0 : 1549.0, 91.0 : 5069.9	0.011, 0.018	3.493	0.0616
TGGTATTCTTTCGTGGTCAGTTCA	0.014	28.8 : 1537.2, 66.7 : 5094.2	0.018, 0.013	2.545	0.1106
TGGTATTCTTTCGTGATCGACGTG	0.011	15.0 : 1551.0, 60.0 : 5100.9	0.010, 0.012	0.453	0.5009
Block 9
TTGCAG	0.341	523.0 : 1059.0, 1782.8 : 3423.2	0.331, 0.342	0.762	0.3828
TCATAG	0.236	375.0 : 1207.0, 1239.0 : 3967.0	0.237, 0.238	0.006	0.9379
CTATCT	0.183	285.0 : 1297.0, 956.0 : 4250.0	0.180, 0.184	0.098	0.7536
CTATAG	0.180	292.0 : 1290.0, 943.0 : 4263.0	0.185, 0.181	0.096	0.7562
TTGTAG	0.060	107.0 : 1475.0, 285.2 : 4920.8	0.068, 0.055	3.688	0.0548
Block 10
CT	0.588	924.8 : 669.2, 3100.9 : 2147.1	0.580, 0.591	0.576	0.4477
TT	0.211	337.7 : 1256.3, 1109.1 : 4138.9	0.212, 0.211	0.002	0.9649
TC	0.197	328.1 : 1265.9, 1018.9 : 4229.1	0.206, 0.194	1.052	0.305
Block 11
AT	0.529	855.0 : 737.0, 2760.0 : 2482.0	0.537, 0.527	0.545	0.4604
CC	0.450	717.0 : 875.0, 2371.0 : 2871.0	0.450, 0.452	0.018	0.8921
AC	0.021	20.0 : 1572.0, 111.0 : 5131.0	0.013, 0.021	4.817	0.0282
Block 12
CTT	0.436	672.2 : 921.8, 2298.9 : 2945.1	0.422, 0.438	1.381	0.24
CCC	0.291	448.7 : 1145.3, 1527.8 : 3716.2	0.282, 0.291	0.574	0.4487
TCC	0.190	322.3 : 1271.7, 981.9 : 4262.1	0.202, 0.187	1.775	0.1828
CTC	0.067	115.9 : 1478.1, 351.5 : 4892.5	0.073, 0.067	0.626	0.4289
Block 13
ATTG	0.359	576.4 : 1013.6, 1895.6 : 3336.4	0.363, 0.362	0.0	0.9879
GTTA	0.220	317.0 : 1273.0, 1128.0 : 4104.0	0.199, 0.216	1.93	0.1648
GTCA	0.167	255.4 : 1334.6, 890.1 : 4341.9	0.161, 0.170	0.789	0.3743
ATCA	0.132	229.7 : 1360.3, 674.7 : 4557.3	0.144, 0.129	2.56	0.1096
ACCA	0.111	183.7 : 1406.3, 593.0 : 4639.0	0.116, 0.113	0.058	0.8097
Block 14
CC	0.692	1099.0 : 495.0, 3609.6 : 1638.4	0.689, 0.688	0.016	0.9002
TC	0.192	301.0 : 1293.0, 1008.4 : 4239.6	0.189, 0.192	0.087	0.7677
CT	0.117	194.0 : 1400.0, 630.0 : 4618.0	0.122, 0.120	0.032	0.8584
Block 15
CACG	0.599	924.0 : 664.0, 3107.8 : 2112.2	0.582, 0.595	0.918	0.338
CGCG	0.151	226.0 : 1362.0, 790.2 : 4429.8	0.142, 0.151	0.789	0.3745
TGCG	0.136	235.0 : 1353.0, 725.0 : 4495.0	0.148, 0.139	0.832	0.3618
TAAG	0.064	113.0 : 1475.0, 332.2 : 4887.8	0.071, 0.064	1.124	0.2891
TGAT	0.051	90.0 : 1498.0, 264.8 : 4955.2	0.057, 0.051	0.874	0.3499
Block 16
GATAGAC	0.288	456.8 : 1125.2, 1524.8 : 3687.2	0.289, 0.293	0.086	0.7696
GGCGAGC	0.279	460.0 : 1122.0, 1435.0 : 3777.0	0.291, 0.275	1.439	0.2303
GATAGGT	0.184	291.2 : 1290.8, 932.8 : 4279.2	0.184, 0.179	0.217	0.6417
AGCGGAC	0.165	252.0 : 1330.0, 862.3 : 4349.7	0.159, 0.165	0.336	0.562
GACGGAC	0.052	78.0 : 1504.0, 275.2 : 4936.8	0.049, 0.053	0.297	0.5856
Block 17
ATT	0.335	525.5 : 1068.5, 1775.0 : 3473.0	0.330, 0.338	0.402	0.5259
GCT	0.325	523.3 : 1070.7, 1703.1 : 3544.9	0.328, 0.325	0.08	0.7773
ATC	0.165	265.4 : 1328.6, 876.1 : 4371.9	0.166, 0.167	0.002	0.967
GTT	0.107	170.1 : 1423.9, 542.3 : 4705.7	0.107, 0.103	0.147	0.7018
ACT	0.056	90.1 : 1503.9, 298.4 : 4949.6	0.057, 0.057	0.002	0.9617
Block 18
AT	0.376	615.2 : 978.8, 1988.1 : 3259.9	0.386, 0.379	0.262	0.6085
GC	0.349	541.5 : 1052.5, 1811.7 : 3436.3	0.340, 0.345	0.164	0.6856
GT	0.247	388.8 : 1205.2, 1307.9 : 3940.1	0.244, 0.249	0.184	0.6679
AC	0.028	48.5 : 1545.5, 140.3 : 5107.7	0.030, 0.027	0.619	0.4314
Block 19
AG	0.530	838.6 : 755.4, 2724.6 : 2523.4	0.526, 0.519	0.235	0.6281
GT	0.289	445.6 : 1148.4, 1560.2 : 3687.8	0.280, 0.297	1.86	0.1726
GG	0.179	308.4 : 1285.6, 954.8 : 4293.2	0.193, 0.182	1.084	0.2979
Block 20
TTC	0.354	573.8 : 1020.2, 1878.0 : 3370.0	0.360, 0.358	0.024	0.8763
TCT	0.300	461.6 : 1132.4, 1561.8 : 3686.2	0.290, 0.298	0.375	0.5405
CTC	0.167	269.8 : 1324.2, 889.3 : 4358.7	0.169, 0.169	0.0	0.9856
TCC	0.126	205.9 : 1388.1, 647.2 : 4600.8	0.129, 0.123	0.387	0.534
CCC	0.039	56.4 : 1537.6, 207.5 : 5040.5	0.035, 0.040	0.563	0.4531
CCT	0.012	20.8 : 1573.2, 53.2 : 5194.8	0.013, 0.010	0.952	0.3292
Block 21
GG	0.566	909.3 : 684.7, 2935.0 : 2313.0	0.570, 0.559	0.625	0.4291
AA	0.333	537.4 : 1056.6, 1779.5 : 3468.5	0.337, 0.339	0.021	0.8839
GA	0.097	143.6 : 1450.4, 512.5 : 4735.5	0.090, 0.098	0.801	0.3709
Block 22
GATGTGC	0.790	1252.0 : 336.0, 4134.5 : 1089.5	0.788, 0.791	0.068	0.7943
GCCGCGC	0.080	126.0 : 1462.0, 407.7 : 4816.3	0.079, 0.078	0.029	0.8658
ACTTCAT	0.077	126.0 : 1462.0, 392.0 : 4832.0	0.079, 0.075	0.322	0.5707
GATGCGC	0.032	57.0 : 1531.0, 171.5 : 5052.5	0.036, 0.033	0.355	0.5514
GCCGTGC	0.019	25.0 : 1563.0, 107.3 : 5116.7	0.016, 0.021	1.471	0.2252
Block 23
CG	0.696	1097.4 : 496.6, 3661.1 : 1586.9	0.688, 0.698	0.482	0.4874
AA	0.218	375.4 : 1218.6, 1126.3 : 4121.7	0.236, 0.215	3.121	0.0773
CA	0.082	113.6 : 1480.4, 441.9 : 4806.1	0.071, 0.084	2.752	0.0971
Block 24
CAG	0.472	746.5 : 843.5, 2454.0 : 2790.0	0.469, 0.468	0.011	0.915
TGG	0.203	343.5 : 1246.5, 1077.2 : 4166.8	0.216, 0.205	0.834	0.3611
TAG	0.178	280.5 : 1309.5, 947.0 : 4297.0	0.176, 0.181	0.143	0.7056
TAT	0.121	181.0 : 1409.0, 634.0 : 4610.0	0.114, 0.121	0.58	0.4465
CGG	0.027	38.5 : 1551.5, 131.9 : 5112.1	0.024, 0.025	0.042	0.8367
Block 25
CG	0.613	972.0 : 620.0, 3228.0 : 2014.0	0.611, 0.616	0.142	0.7066
CT	0.225	353.0 : 1239.0, 1179.0 : 4063.0	0.222, 0.225	0.071	0.7899
TT	0.161	267.0 : 1325.0, 835.0 : 4407.0	0.168, 0.159	0.641	0.4235
Block 26
ATC	0.689	1084.9 : 509.1, 3642.8 : 1603.2	0.681, 0.694	1.084	0.2978
ACT	0.157	258.0 : 1336.0, 839.0 : 4407.0	0.162, 0.160	0.034	0.8544
GTT	0.142	229.9 : 1364.1, 704.8 : 4541.2	0.144, 0.134	1.016	0.3135
Block 27
GAGAA	0.532	853.0 : 733.0, 2756.9 : 2475.1	0.538, 0.527	0.579	0.4466
GGAAA	0.292	469.0 : 1117.0, 1549.8 : 3682.2	0.296, 0.296	0.001	0.9693
AGGGC	0.128	189.0 : 1397.0, 688.9 : 4543.1	0.119, 0.132	1.701	0.1921
GGAGA	0.032	48.0 : 1538.0, 160.2 : 5071.8	0.030, 0.031	0.005	0.9435
Block 28
GT	0.759	1231.8 : 362.2, 3938.6 : 1299.4	0.773, 0.752	2.887	0.0893
AG	0.167	250.0 : 1344.0, 886.7 : 4351.3	0.157, 0.169	1.364	0.2428
AT	0.074	112.2 : 1481.8, 412.7 : 4825.3	0.070, 0.079	1.218	0.2697
Block 29
AT	0.598	912.8 : 681.2, 3157.5 : 2090.5	0.573, 0.602	4.261	0.039
CC	0.365	610.4 : 983.6, 1891.1 : 3356.9	0.383, 0.360	2.683	0.1014
AC	0.034	68.6 : 1525.4, 183.9 : 5064.1	0.043, 0.035	2.213	0.1368
Block 30
TC	0.482	820.6 : 769.4, 2507.3 : 2736.7	0.516, 0.478	7.045	0.0079
TT	0.273	407.7 : 1182.3, 1437.7 : 3806.3	0.256, 0.274	1.947	0.1629
GC	0.246	361.7 : 1228.3, 1299.0 : 3945.0	0.227, 0.248	2.718	0.0992
Block 31
GCAC	0.460	722.0 : 870.0, 2431.7 : 2808.3	0.454, 0.464	0.546	0.4599
ATAC	0.254	380.0 : 1212.0, 1370.0 : 3870.0	0.239, 0.261	3.319	0.0685
GCGC	0.212	368.0 : 1224.0, 1072.3 : 4167.7	0.231, 0.205	5.16	0.0231
GCAT	0.071	119.0 : 1473.0, 352.0 : 4888.0	0.075, 0.067	1.091	0.2962
Block 32
ATA	0.513	819.8 : 774.2, 2618.2 : 2621.8	0.514, 0.500	1.044	0.3069
ACC	0.208	336.8 : 1257.2, 1113.2 : 4126.8	0.211, 0.212	0.01	0.9194
CCC	0.200	316.0 : 1278.0, 1069.0 : 4171.0	0.198, 0.204	0.251	0.6162
ATC	0.077	120.2 : 1473.8, 426.8 : 4813.2	0.075, 0.081	0.599	0.4388
Block 33
TG	0.497	779.2 : 814.8, 2642.1 : 2605.9	0.489, 0.503	1.05	0.3055
TA	0.332	550.8 : 1043.2, 1716.9 : 3531.1	0.346, 0.327	1.874	0.171
GG	0.161	243.8 : 1350.2, 837.3 : 4410.7	0.153, 0.160	0.396	0.5294
Block 34
TCC	0.354	594.7 : 999.3, 1813.3 : 3432.7	0.373, 0.346	4.024	0.0448
CCT	0.242	378.7 : 1215.3, 1304.1 : 3941.9	0.238, 0.249	0.8	0.371
CAC	0.198	301.7 : 1292.3, 1060.0 : 4186.0	0.189, 0.202	1.26	0.2617
CCC	0.183	287.7 : 1306.3, 958.9 : 4287.1	0.180, 0.183	0.044	0.8335
TAC	0.023	31.3 : 1562.7, 109.7 : 5136.3	0.020, 0.021	0.094	0.7595
Block 35
CTTCGG	0.443	730.0 : 854.0, 2274.0 : 2938.0	0.461, 0.436	2.97	0.0848
TTCTAG	0.299	470.8 : 1113.2, 1577.2 : 3634.8	0.297, 0.303	0.166	0.6834
CCCTAG	0.157	238.0 : 1346.0, 820.0 : 4392.0	0.150, 0.157	0.463	0.4963
CCCTGA	0.062	95.0 : 1489.0, 330.0 : 4882.0	0.060, 0.063	0.231	0.6306
CTTTAG	0.025	30.0 : 1554.0, 134.0 : 5078.0	0.019, 0.026	2.365	0.1241
TTCTGG	0.013	18.2 : 1565.8, 63.8 : 5148.2	0.011, 0.012	0.06	0.8059
Block 36
ACG	0.750	1212.4 : 381.6, 3959.9 : 1286.1	0.761, 0.755	0.22	0.6394
GTG	0.122	176.7 : 1417.3, 636.3 : 4609.7	0.111, 0.121	1.273	0.2592
GCA	0.089	141.7 : 1452.3, 458.8 : 4787.2	0.089, 0.087	0.032	0.8576
ACA	0.022	31.3 : 1562.7, 102.2 : 5143.8	0.020, 0.019	0.001	0.9715
GCG	0.015	28.6 : 1565.4, 72.1 : 5173.9	0.018, 0.014	1.491	0.2221
Block 37
AC	0.836	1345.3 : 248.7, 4398.0 : 850.0	0.844, 0.838	0.323	0.57
CA	0.125	194.4 : 1399.6, 642.0 : 4606.0	0.122, 0.122	0.002	0.9673
CC	0.023	26.7 : 1567.3, 124.0 : 5124.0	0.017, 0.024	2.702	0.1002
AA	0.017	27.6 : 1566.4, 84.0 : 5164.0	0.017, 0.016	0.132	0.7159
Block 38
GC	0.511	813.4 : 780.6, 2707.4 : 2538.6	0.510, 0.516	0.166	0.6837
AT	0.254	410.0 : 1184.0, 1306.0 : 3940.0	0.257, 0.249	0.444	0.5051
AC	0.236	370.6 : 1223.4, 1232.6 : 4013.4	0.233, 0.235	0.041	0.8404
Block 39
AAAAG	0.296	457.6 : 1134.4, 1608.0 : 3630.0	0.287, 0.307	2.21	0.1371
GGAGG	0.291	465.9 : 1126.1, 1512.4 : 3725.6	0.293, 0.289	0.09	0.7636
AGGGG	0.201	337.0 : 1255.0, 1024.5 : 4213.5	0.212, 0.196	1.981	0.1593
GGAAA	0.162	241.6 : 1350.4, 839.0 : 4399.0	0.152, 0.160	0.644	0.4223
GAAGG	0.012	21.8 : 1570.2, 66.9 : 5171.1	0.014, 0.013	0.086	0.7697
GAAAG	0.012	18.1 : 1573.9, 65.2 : 5172.8	0.011, 0.012	0.111	0.7387
GGAAG	0.010	19.2 : 1572.8, 43.9 : 5194.1	0.012, 0.008	1.826	0.1765
Block 40
ACC	0.554	887.1 : 706.9, 2919.5 : 2328.5	0.557, 0.556	0.0	0.9895
ATC	0.203	305.4 : 1288.6, 1105.0 : 4143.0	0.192, 0.211	2.688	0.1011
GCC	0.138	211.9 : 1382.1, 716.5 : 4531.5	0.133, 0.137	0.132	0.7161
GTT	0.089	154.1 : 1439.9, 426.6 : 4821.4	0.097, 0.081	3.71	0.0541
GTC	0.010	23.0 : 1571.0, 53.0 : 5195.0	0.014, 0.010	2.092	0.1481
Block 41
CTTCG	0.361	558.2 : 1033.8, 1930.4 : 3311.6	0.351, 0.368	1.646	0.1996
TCCTA	0.281	476.0 : 1116.0, 1423.6 : 3818.4	0.299, 0.272	4.577	0.0324
CTCCG	0.186	299.2 : 1292.8, 1004.1 : 4237.9	0.188, 0.192	0.104	0.7469
CCCTG	0.080	131.3 : 1460.7, 413.6 : 4828.4	0.082, 0.079	0.215	0.6432
CCCTA	0.038	54.0 : 1538.0, 200.4 : 5041.6	0.034, 0.038	0.635	0.4256
TTCCG	0.028	39.8 : 1552.2, 136.9 : 5105.1	0.025, 0.026	0.058	0.8092
TCCCG	0.019	25.6 : 1566.4, 96.5 : 5145.5	0.016, 0.018	0.371	0.5422
Block 42
AGCCCG	0.478	744.2 : 845.8, 2484.5 : 2753.5	0.468, 0.474	0.193	0.6608
AAATCG	0.162	263.3 : 1326.7, 852.8 : 4385.2	0.166, 0.163	0.07	0.7915
AACTTG	0.153	254.8 : 1335.2, 818.4 : 4419.6	0.160, 0.156	0.149	0.6997
GGCTCA	0.128	210.8 : 1379.2, 653.5 : 4584.5	0.133, 0.125	0.678	0.4102
GGCTCG	0.033	38.2 : 1551.8, 177.8 : 5060.2	0.024, 0.034	3.914	0.0479
AACTCG	0.019	31.2 : 1558.8, 111.4 : 5126.6	0.020, 0.021	0.163	0.6861
GGCCCG	0.015	29.1 : 1560.9, 76.3 : 5161.7	0.018, 0.015	1.102	0.2939
Block 43
CAGA	0.400	639.6 : 954.4, 2075.4 : 3172.6	0.401, 0.395	0.172	0.6785
CAAA	0.293	450.4 : 1143.6, 1546.3 : 3701.7	0.283, 0.295	0.866	0.3522
ACGG	0.166	266.3 : 1327.7, 870.4 : 4377.6	0.167, 0.166	0.013	0.9098
ACGA	0.046	71.1 : 1522.9, 248.2 : 4999.8	0.045, 0.047	0.2	0.6545
AAGA	0.021	39.0 : 1555.0, 116.0 : 5132.0	0.024, 0.022	0.313	0.5758
AAAA	0.021	34.5 : 1559.5, 124.3 : 5123.7	0.022, 0.024	0.221	0.6382
CCGA	0.014	27.3 : 1566.7, 71.3 : 5176.7	0.017, 0.014	1.057	0.3039
CCGG	0.014	21.3 : 1572.7, 66.7 : 5181.3	0.013, 0.013	0.039	0.8438
ACAA	0.011	18.3 : 1575.7, 57.7 : 5190.3	0.012, 0.011	0.029	0.8645
Block 44
CC	0.417	687.4 : 906.6, 2154.6 : 3093.4	0.431, 0.411	2.154	0.1422
AC	0.355	548.6 : 1045.4, 1888.0 : 3360.0	0.344, 0.360	1.297	0.2547
CT	0.228	358.0 : 1236.0, 1205.4 : 4042.6	0.225, 0.230	0.179	0.6719
Block 45
ACCG	0.513	821.7 : 772.3, 2690.6 : 2545.4	0.516, 0.514	0.013	0.9081
ATCA	0.320	496.2 : 1097.8, 1663.1 : 3572.9	0.311, 0.318	0.229	0.6325
GTCG	0.092	144.6 : 1449.4, 486.8 : 4749.2	0.091, 0.093	0.073	0.7868
GTTG	0.055	98.3 : 1495.7, 282.9 : 4953.1	0.062, 0.054	1.345	0.2462
ATCG	0.011	18.4 : 1575.6, 62.2 : 5173.8	0.012, 0.012	0.013	0.9091
Block 46
CAT	0.516	790.3 : 803.7, 2724.1 : 2523.9	0.496, 0.519	2.649	0.1036
AAC	0.281	463.7 : 1130.3, 1457.5 : 3790.5	0.291, 0.278	1.052	0.3049
CAC	0.118	199.3 : 1394.7, 605.1 : 4642.9	0.125, 0.115	1.112	0.2916
CGC	0.084	138.4 : 1455.6, 453.4 : 4794.6	0.087, 0.086	0.003	0.9566
Block 47
TTC	0.442	676.1 : 917.9, 2334.1 : 2913.9	0.424, 0.445	2.102	0.1471
CCC	0.217	337.1 : 1256.9, 1133.7 : 4114.3	0.211, 0.216	0.15	0.699
TCT	0.146	248.0 : 1346.0, 749.6 : 4498.4	0.156, 0.143	1.586	0.2078
CTC	0.113	198.9 : 1395.1, 605.9 : 4642.1	0.125, 0.115	1.019	0.3128
TCC	0.077	123.9 : 1470.1, 403.3 : 4844.7	0.078, 0.077	0.013	0.9082
Block 48
GCGAGGA	0.321	483.0 : 1107.0, 1718.6 : 3507.4	0.304, 0.329	3.507	0.0611
TTACGAG	0.179	303.3 : 1286.7, 906.8 : 4319.2	0.191, 0.174	2.478	0.1154
GCGAGGG	0.148	226.2 : 1363.8, 762.3 : 4463.7	0.142, 0.146	0.128	0.7208
TCACGGG	0.103	157.4 : 1432.6, 537.6 : 4688.4	0.099, 0.103	0.197	0.657
GCACGGG	0.058	103.5 : 1486.5, 285.1 : 4940.9	0.065, 0.055	2.529	0.1118
GCAAGGG	0.042	79.3 : 1510.7, 217.0 : 5009.0	0.050, 0.042	2.033	0.1539
GCACGAG	0.041	72.3 : 1517.7, 217.1 : 5008.9	0.045, 0.042	0.459	0.4979
GCAAGAG	0.022	39.5 : 1550.5, 108.4 : 5117.6	0.025, 0.021	0.97	0.3246
GCAAGGA	0.021	31.0 : 1559.0, 126.0 : 5100.0	0.020, 0.024	1.143	0.2851
TCGAGGG	0.017	24.1 : 1565.9, 82.8 : 5143.2	0.015, 0.016	0.037	0.847
TTACAGG	0.011	14.0 : 1576.0, 61.0 : 5165.0	0.009, 0.012	0.921	0.3372
Block 49
CACAC	0.743	1151.9 : 434.1, 3874.9 : 1353.1	0.726, 0.741	1.392	0.2381
ACCGT	0.115	210.9 : 1375.1, 590.9 : 4637.1	0.133, 0.113	4.654	0.031
CACGC	0.072	120.0 : 1466.0, 384.9 : 4843.1	0.076, 0.074	0.074	0.7853
CCTGC	0.050	76.0 : 1510.0, 253.0 : 4975.0	0.048, 0.048	0.006	0.9385
ACCAC	0.013	19.0 : 1567.0, 79.9 : 5148.1	0.012, 0.015	0.925	0.3363
Block 50
GC	0.515	799.0 : 795.0, 2683.0 : 2565.0	0.501, 0.511	0.488	0.4848
AA	0.322	506.3 : 1087.7, 1719.0 : 3529.0	0.318, 0.328	0.546	0.4598
GA	0.163	288.7 : 1305.3, 846.0 : 4402.0	0.181, 0.161	3.497	0.0615
Block 51
AC	0.563	876.0 : 718.0, 2960.0 : 2288.0	0.550, 0.564	1.038	0.3082
GC	0.231	362.5 : 1231.5, 1210.4 : 4037.6	0.227, 0.231	0.071	0.7903
GA	0.205	355.5 : 1238.5, 1077.6 : 4170.4	0.223, 0.205	2.304	0.1291
Block 52
AGTCCG	0.385	605.0 : 985.0, 2013.0 : 3187.0	0.380, 0.387	0.225	0.6355
ATTTCA	0.187	294.0 : 1296.0, 998.0 : 4202.0	0.185, 0.192	0.39	0.5321
CGCTTG	0.173	274.7 : 1315.3, 882.2 : 4317.8	0.173, 0.170	0.084	0.7716
CGCTCG	0.111	179.3 : 1410.7, 561.0 : 4639.0	0.113, 0.108	0.297	0.5857
AGCTCG	0.075	125.7 : 1464.3, 383.0 : 4817.0	0.079, 0.074	0.515	0.4728
AGCTTG	0.061	98.3 : 1491.7, 312.8 : 4887.2	0.062, 0.060	0.059	0.8086
Block 53
CGA	0.462	719.5 : 872.5, 2429.3 : 2816.7	0.452, 0.463	0.607	0.436
TGA	0.392	628.5 : 963.5, 2075.3 : 3170.7	0.395, 0.396	0.004	0.9524
CAA	0.107	184.0 : 1408.0, 531.4 : 4714.6	0.116, 0.101	2.661	0.1028
CGG	0.039	60.0 : 1532.0, 210.0 : 5036.0	0.038, 0.040	0.177	0.6743
Block 54
TGTTG	0.491	759.5 : 830.5, 2579.7 : 2660.3	0.478, 0.492	1.043	0.3071
TGGCA	0.325	525.3 : 1064.7, 1727.8 : 3512.2	0.330, 0.330	0.003	0.96
CAGCG	0.138	236.5 : 1353.5, 696.8 : 4543.2	0.149, 0.133	2.58	0.1082
CGGCG	0.037	56.5 : 1533.5, 195.6 : 5044.4	0.036, 0.037	0.108	0.7428
Block 55
AAC	0.566	908.7 : 683.3, 2969.5 : 2276.5	0.571, 0.566	0.112	0.7379
AAT	0.187	307.0 : 1285.0, 959.1 : 4286.9	0.193, 0.183	0.815	0.3666
AGT	0.159	255.0 : 1337.0, 851.0 : 4395.0	0.160, 0.162	0.038	0.8463
CAC	0.085	118.3 : 1473.7, 452.0 : 4794.0	0.074, 0.086	2.246	0.134
Block 56
GCTA	0.451	701.9 : 890.1, 2373.5 : 2864.5	0.441, 0.453	0.742	0.3891
GTGG	0.244	399.0 : 1193.0, 1282.9 : 3955.1	0.251, 0.245	0.215	0.6431
GTTG	0.160	258.0 : 1334.0, 832.1 : 4405.9	0.162, 0.159	0.093	0.7605
TTGG	0.076	119.0 : 1473.0, 398.5 : 4839.5	0.075, 0.076	0.03	0.8628
GCTG	0.064	110.7 : 1481.3, 326.4 : 4911.6	0.070, 0.062	1.071	0.3008
Block 57
ACGTG	0.440	688.4 : 905.6, 2308.7 : 2931.3	0.432, 0.441	0.378	0.5385
GTGCG	0.261	424.0 : 1170.0, 1353.4 : 3886.6	0.266, 0.258	0.377	0.5391
ATATG	0.174	290.6 : 1303.4, 907.3 : 4332.7	0.182, 0.173	0.714	0.3981
GCGCG	0.037	64.8 : 1529.2, 185.5 : 5054.5	0.041, 0.035	0.968	0.3253
GCGTT	0.034	57.2 : 1536.8, 175.1 : 5064.9	0.036, 0.033	0.226	0.6346
ATGCG	0.027	42.9 : 1551.1, 147.3 : 5092.7	0.027, 0.028	0.065	0.7989
GCGTG	0.015	13.5 : 1580.5, 92.1 : 5147.9	0.008, 0.018	6.684	0.0097
Block 58
ACCA	0.417	632.2 : 961.8, 2194.5 : 3045.5	0.397, 0.419	2.475	0.1157
ATTG	0.289	471.2 : 1122.8, 1502.4 : 3737.6	0.296, 0.287	0.472	0.492
GTCA	0.232	384.9 : 1209.1, 1209.7 : 4030.3	0.241, 0.231	0.77	0.3802
ATCA	0.039	67.8 : 1526.2, 200.4 : 5039.6	0.043, 0.038	0.603	0.4374
ACTG	0.013	20.8 : 1573.2, 79.5 : 5160.5	0.013, 0.015	0.39	0.5324
Block 59
TCGTTA	0.367	591.2 : 1000.8, 1908.8 : 3321.2	0.371, 0.365	0.213	0.6446
CCGTTA	0.241	387.2 : 1204.8, 1256.6 : 3973.4	0.243, 0.240	0.059	0.8082
TTACCG	0.213	334.5 : 1257.5, 1137.6 : 4092.4	0.210, 0.218	0.398	0.5284
TTGCCG	0.067	109.2 : 1482.8, 351.9 : 4878.1	0.069, 0.067	0.035	0.8521
TCGCCA	0.062	96.2 : 1495.8, 313.5 : 4916.5	0.060, 0.060	0.006	0.9404
TCGTTG	0.012	17.6 : 1574.4, 58.3 : 5171.7	0.011, 0.011	0.002	0.9675
Block 60
TTACG	0.619	986.2 : 599.8, 3251.7 : 1986.3	0.622, 0.621	0.005	0.9414
CCCCA	0.208	319.5 : 1266.5, 1100.2 : 4137.8	0.201, 0.210	0.546	0.4599
TTCTG	0.078	126.2 : 1459.8, 411.0 : 4827.0	0.080, 0.078	0.02	0.8869
TCCCG	0.030	46.2 : 1539.8, 148.8 : 5089.2	0.029, 0.028	0.023	0.8792
CCCCG	0.021	43.0 : 1543.0, 98.1 : 5139.9	0.027, 0.019	4.238	0.0395
CCACG	0.014	22.1 : 1563.9, 74.1 : 5163.9	0.014, 0.014	0.005	0.9444
CTCTG	0.010	15.8 : 1570.2, 56.0 : 5182.0	0.010, 0.011	0.061	0.8054
Block 61
TTGT	0.399	638.3 : 953.7, 2102.6 : 3141.4	0.401, 0.401	0.0	0.9985
GTGT	0.231	357.2 : 1234.8, 1226.3 : 4017.7	0.224, 0.234	0.612	0.434
TTGC	0.167	273.6 : 1318.4, 871.4 : 4372.6	0.172, 0.166	0.281	0.5962
GCTT	0.142	226.0 : 1366.0, 730.1 : 4513.9	0.142, 0.139	0.076	0.7824
GCGT	0.043	70.0 : 1522.0, 214.8 : 5029.2	0.044, 0.041	0.283	0.595
GCGC	0.012	17.9 : 1574.1, 67.3 : 5176.7	0.011, 0.013	0.257	0.6121
